1           **Evidences of histologic Thrombotic Microangiopathy and the**  
2           **impact in renal outcomes of patients with IgA nephropathy**

3           **Short Title: IgA Nephropathy and Thrombotic Microangiopathy**

4    Precil D Neves<sup>1\*</sup>, MD, Rafael A Souza<sup>1\*</sup>, MD, Fábio M Torres<sup>1</sup>, MD, Fábio A Reis<sup>1</sup>, MD,  
5    Rafaela B Pinheiro<sup>2</sup>, MD, Cristiane B Dias<sup>1</sup>, MD, PhD, Luis Yu<sup>1</sup>, MD, PhD, Viktoria Woronik<sup>1</sup>,  
6    MD, PhD, Luzia S Furukawa, PhD, Lívia B Cavalcante<sup>2</sup>, MD, Denise M Malheiros<sup>2</sup>, MD, PhD,  
7    Lectícia B Jorge<sup>1</sup>, MD, PhD.

8    *1. Nephrology Division. 2 – Pathology Division.*

9    *University of São Paulo, School of Medicine. São Paulo-SP. Brazil.*

10

11    \* **Both authors contributed equally to this manuscript**

12

13    **Word count of Abstract: 299**

14    **Word count of Manuscript: 2972**

15    **Suggested Academic Editors:** Maria Fragiadaki; Peter Hohenstein; Zhanjun Jia

16

17    **CORRESPONDING AUTHOR:**

18    Precil Diego Miranda de Menezes Neves, MD

19    Nephrology Division - University of São Paulo School of Medicine

20    Av. Dr. Enéas de Carvalho Aguiar, 255, 7º andar, Cerqueira Cesar, São Paulo-SP. Brazil.

21    Tel: 55-11-2661 7165; Fax: 55-11-2661 7165.

22    E-mail: [precilmed61@yahoo.com.br](mailto:precilmed61@yahoo.com.br)

23 **ABSTRACT**

24 **Introduction:** IgA nephropathy (IgAN) is the most common primary glomerulopathy  
25 worldwide. According to the Oxford Classification, changes in the kidney vascular  
26 compartment are not related with worse outcomes. This paper aims to assess the impact of  
27 thrombotic microangiopathy (TMA) in the outcomes of Brazilian patients with IgAN.

28 **Materials and Methods:** Analysis of clinical data and kidney biopsy findings from patients  
29 with IgAN to assess the impact of TMA on renal outcomes.

30 **Results:** The majority of the 118 patients included were females (54.3%); mean age of 33 years  
31 (25;43); hypertension and hematuria were observed in 67.8% and 89.8%, respectively. Median  
32 creatinine: 1.45mg/dL; eGFR: 48.8ml/min/1.73m<sup>2</sup>; 24-hour proteinuria: 2.01g; low serum C3:  
33 12.5%. Regarding to Oxford Classification: M1: 76.3%; E1: 35.6%; S1: 70.3%; T1/T2: 38.3%;  
34 C1/C2: 28.8%. Average follow-up: 65 months. Histologic evidence of TMA were detected in 21  
35 (17.8%) patients and those ones presented more frequently hypertension (100% vs. 61%, *p*  
36 <0.0001), hematuria (100% vs 87.6%, *p*=0.0001), worse creatinine levels (3.8 vs. 1.38 mg/dL,  
37 *p*=0.0001), eGFR (18 vs. 60 ml/min/1.73m<sup>2</sup>), *p* =0.0001), low serum C3 (28.5% vs. 10.4%, *p*  
38 =0.003), lower hemoglobin levels (10.6 vs. 12.7g/dL, *p*<0.001) and platelet counts (207,000 vs.  
39 267,000, *p*=0.001). Biopsy findings of individuals with TMA revealed only greater proportions  
40 of E1 (68% vs. 32%, *p* = 0.002). Individuals with TMA were followed for less time (7 vs. 65  
41 months, *p*<0.0001) since they progressed more frequently to chronic kidney disease (CKD)  
42 requiring renal replacement therapy (RRT) (71.4% vs. 21,6%, *p*<0.0001). Male sex, T1/T2, and  
43 TMA were independently associated with progression to CKD-RRT.

44 **Conclusions:** In this study patients with TMA had worse clinical manifestations and outcomes.  
45 In terms of histologic evidence, E1 distinguished patients with TMA from other patients. These  
46 findings indicate that vascular compartment may also be a prognostic marker in IgAN patients.

47

48 **Keywords:** IgA Nephropathy; kidney biopsy; pathology; prognostic factors; thrombotic  
49 microangiopathy; complement protein

## 50 INTRODUCTION

51 IgA nephropathy (IgAN) is a highly prevalent condition worldwide and ranks as the  
52 most common primary glomerulopathy in some countries.<sup>1-3</sup> Given the high prevalence of the  
53 disease and the fact that about 30% of the patients with IgAN progress to chronic kidney disease  
54 (CKD) requiring kidney replacement therapy (KRT),<sup>1,4</sup> it is imperative to identify clinical and  
55 histology markers associated with worse renal outcomes.

56 The most widely accepted explanation for the IgAN pathogenesis is the 4-hit  
57 hypothesis, in which Hit 1 involves the production of hypoglycosylated IgA1; Hit 2 starts with  
58 the production of IgG antibodies that recognize hypoglycosylated IgA1; Hit 3 regards the  
59 formation of potentially nephritogenic IgG/IgA1 immune complexes; and in the Hit 4 there is  
60 deposition of formed complexes in the glomerular mesangium and capillaries, thereby  
61 activating the immune system and leading to the recruitment of inflammatory cells, cytokines,  
62 and the activation of the complement system.<sup>1,2,5</sup>

63 The Oxford Classification (OC)<sup>6,7</sup> was first published in 2009 as an attempt to identify  
64 kidney biopsy alterations possibly associated with worse outcomes in patients with IgAN.  
65 Mesangial hypercellularity, segmental glomerulosclerosis, and interstitial fibrosis/tubular  
66 atrophy have been associated with progression to CKD-KRT, while endocapillary  
67 hypercellularity was first correlated with function decline in patients on immunosuppressant  
68 therapy and later with worse renal outcomes. An updated version of the Oxford Classification  
69 was published in 2017,<sup>8</sup> and cellular crescents were added as markers of worse renal outcomes.  
70 It should be mentioned that vascular alterations were not included in the Oxford Classification,  
71 since they were not associated with worse outcomes in patients with IgAN. However, recent  
72 studies<sup>9-11</sup> have looked into the role of vascular alterations and their ties with the outcomes of  
73 patients with IgAN, shedding light on a matter yet unresolved in the literature.

74 Thrombotic microangiopathy (TMA) is a histology finding of vascular involvement  
75 associated with some renal conditions – atypical and typical hemolytic-uremic syndrome,

76 eclampsia, accelerated hypertension, thrombotic thrombocytopenic purpura – that may also be  
77 induced by certain drugs.<sup>12,13</sup> Histology and serum findings of TMA have been associated with  
78 other primary and secondary glomerulopathies – lupus nephritis, ANCA-associated vasculitis,  
79 focal segmental glomerulosclerosis, and IgA nephropathy – and correlated with worse renal  
80 outcomes in individuals with IgAN.<sup>9,10,14,15</sup>

81 This study aimed to assess the impact of histologic findings of TMA on the renal  
82 outcomes of individuals with IgAN seen at a healthcare center in Brazil.

83

## 84 **MATERIALS AND METHODS**

85

### 86 *Study Design and Population*

87 This retrospective single-center study included patients diagnosed with IgA  
88 nephropathy based on kidney biopsy findings. Patients with IgAN secondary to systemic  
89 conditions (Henoch-Schönlein purpura, liver disease, autoimmune disease, HIV infection) and  
90 individuals with insufficient follow-up or outcome data were excluded, along with patients with  
91 fewer than eight glomeruli for analysis via the Oxford Classification.

92 The following clinical data were considered at the time of kidney biopsy: age; sex;  
93 serum creatinine (SCr); estimated glomerular filtration rate (e-GFR); 24-hour proteinuria and/or  
94 urine protein/creatinine (UPC) ratio; hematuria; hypertension; serum C3 level; serum IgA;  
95 hemoglobin; platelet count; lactate dehydrogenase (LDH); and indirect bilirubin. The  
96 glomerular filtration rate was estimated based on the CKD-EPI<sup>16</sup> equation. Hematuria was  
97 defined as  $\geq 3$  red blood cells/high-power field in a sample of urine. Hypertension was defined  
98 as a blood pressure  $\geq 140$  and/or 90mmHg<sup>17</sup>. The reference ranges laboratory tests were as  
99 follows: C3 (90-180mg/dL); IgA (69-382mg/dL); LDH (135-214U/L); indirect bilirubin (0.2 ;  
100 0.8mg/dL); haptoglobin (30-200mg/dL). Anemia was defined as hemoglobin  $< 12$ g/dL for

101 females and 13g/dL for males.<sup>18</sup> Thrombocytopenia was defined as having a platelet count  
102 <150,000/mm<sup>3</sup>.<sup>19</sup> Presence of schistocytes was verified via peripheral blood smear tests.

103 Patients were also analyzed for prescription of angiotensin-converting-enzyme (ACE) inhibitors  
104 or angiotensin II receptor blockers (ARBs), corticosteroids, and other immunosuppressants. The  
105 end of follow-up was defined either by the last visit of the patient to the healthcare unit or by  
106 referral to dialysis or kidney transplantation.

107

### 108 *Histopathology*

109 Kidney biopsy specimens analyzed by light microscopy were stained by hematoxylin and eosin  
110 (H&E), Masson's trichrome, periodic acid–Schiff (PAS), and periodic acid silver methenamine  
111 stain (PAMS). Analysis by immunofluorescence microscopy included serum anti-IgA, IgG,  
112 IgM, C3, C1q, kappa and lambda light chains, and fibrinogen, with positive deposition defined  
113 when intensity  $\geq 1$ . The biopsies were reviewed by a renal pathologist and classified based on  
114 the latest version of the Oxford Classification.<sup>8</sup>

115 As previously described in the literature,<sup>20</sup> acute TMA histologic findings were categorized  
116 based on renal compartments. In glomeruli: presence of thrombi, edema, or endothelial  
117 denudation, fragmented red blood cells, mesangiolysis, microaneurysms; in arterioles: thrombi,  
118 edema, or endothelial denudation, intramural fibrin, fragmented red blood cells, edema of the  
119 intima, myocyte necrosis; and in arteries: thrombi, myxoid intimal change, intramural fibrin,  
120 fragmented red blood cells. Chronic findings included in glomeruli: double contour in  
121 capillaries with mesangial interposition; in arterioles hyaline deposits; in arteries fibrous intimal  
122 thickening and concentric lamination resembling the bulb of an onion. Histologic findings of  
123 TMA were assessed only based on light microscopy examination.

124

### 125 *CD68 Immunohistochemistry*

126 Formalin-fixed, paraffin-embedded tissue was sectioned at 2 $\mu$ m and stained with rabbit  
127 monoclonal anti-CD68 (Santa Cruz Biotechnology) as the primary antibody. All cases were  
128 stained by hand using routine protocols, including deparaffinization, followed by antigen  
129 retrieval (tissue section was boiled in 1mM EDTA, pH 8.0 for 10 min followed by cooling at  
130 room temperature for 20 min), protein blocking (DPB-125S; Spring, Pleasanton, CA, USA),  
131 incubation for primary antibody at room temperature for 30 min (1:40) and for secondary goat  
132 anti-rabbit IgG (DHRR-999; Spring, Pleasanton, CA, USA) at 1:360. Detection was performed  
133 with streptavidin/horseradish peroxidase (SPB-125; Spring) and developed with Stable DAB  
134 (Spring). CD68-positive cells in the glomeruli and tubulointerstitium were quantified and the  
135 final count was expressed as number of cells/glomerulus and cells/field, respectively.

136

#### 137 *Endpoint Analysis*

138 Progression to CKD-KRT was the primary endpoint assessed. Secondary endpoint included  
139 achieving an e-GFR  $\leq$ 60ml/min/1.73m<sup>2</sup>.

140

#### 141 *Statistical Analysis*

142 The distribution of variables was assessed with the Shapiro-Wilk test. Qualitative variables were  
143 expressed as proportions and compared against each other via the chi-squared test or Fisher's  
144 exact test. Variables following a parametric distribution were expressed as mean values  $\pm$   
145 standard error and compared against each other with Student's t-test. Variables with non-  
146 parametric distributions were expressed as median values (p25 and p75) and compared against  
147 each other with the Mann-Whitney U test. Logistic regression was used in multivariate analysis.  
148 Statistical significance was attributed to p-values  $<$ 0.05.

149

## 150 **RESULTS**

151 Exclusion criteria accounted for the removal of 50 patients from the original population  
152 of 168 individuals. Of the remaining 118 patients, 65 were females (55%), 86 were whites  
153 (73%), 80 (67.8%) presented with hypertension and 106 (89.8%) hematuria (89.8%). Low  
154 serum C3 was detected in 15 (12.5%) patients. Table 1 shows patient data and laboratory tests at  
155 the time of kidney biopsy. Histologic findings based on the Oxford Classification were as  
156 follows: M1 (76.3%), E1 (35.6%), S1 (70.3%), T1/T2 (38.3%), and C1/C2 (28.8%). Histologic  
157 evidence of TMA was seen in 21 (17.8%) patients. The median follow-up time was 65 months,  
158 and 36 individuals progressed to CKD-KRT.

159 Table 2 describes the presence of serum findings consistent with TMA in patients with  
160 and without histologic evidence of TMA. When compared to individuals without signs of TMA  
161 in kidney biopsy, patients with histologic evidence of TMA had more anemia (81.3% vs. 24.7%,  
162  $p=0.001$ ), more schistocytes in peripheral blood (44.5% vs. 3.1%,  $p=0.0007$ ), and were more  
163 prone to developing thrombocytopenia, albeit not significantly (14.3% vs. 4.1%,  $p=0.07$ ).

164 The analysis of patients with and without TMA on kidney biopsy (Table 3) revealed that  
165 the first group had a greater proportion of hypertensive individuals (100 vs. 61,  $p<0.0001$ ) and  
166 with hematuria (100 vs. 87.6,  $p=0.0001$ ). Patients with TMA had worse median serum  
167 creatinine levels (3.8 vs. 1.38 mg/dL,  $p=0.0001$ ), eGFR (18 vs. 60.2 ml/min/1.73m<sup>2</sup>,  $p=0.0001$ ),  
168 and more frequent low serum C3 (28.5 vs. 10.4,  $p=0.003$ ). There was no difference in the  
169 treatment prescribed to the two groups of patients. In regard to the histology parameters of the  
170 Oxford Classification, solely a higher proportion of individuals with E1 was observed (68% vs.  
171 32%,  $p<0.002$ ). Patients with histologic evidence TMA were followed for less time (7 vs. 65  
172 months,  $p<0.0001$ ), since a greater portion of them progressed to CKD-KRT (71.4% vs. 21.6%,  
173  $p<0.0001$ ) and in less time (3 vs. 16 months,  $p=0.003$ ) on account of the quicker eGFR decrease  
174 they experienced (-6.8 vs. -0.65 ml/min/1.73m<sup>2</sup>/year,  $p=0.01$ ).

175 The comparison of patients that progressed or not to CKD-KRT (Table 4) revealed that  
176 most of the individuals in the first group were males (63.8% vs. 36.5%,  $p=0.01$ ), younger (30 vs.

177 34 years of age,  $p=0.04$ ), had hypertension (86.1% vs. 56.1%,  $p=0.0016$ ), worse creatinine  
178 levels at the biopsy time (3 vs. 1.2mg/dL,  $p<0.0001$ ), lower eGFR (22.5 vs. 64.8ml/min/1.73m<sup>2</sup>,  
179  $p<0.0001$ ), and more frequent low serum C3 (25.7% vs 7,3%,  $p=0.01$ ), without difference in  
180 proteinuria. Kidney biopsy findings pointed to a greater proportion of patients with T1/T2  
181 (54.2% vs. 23,2%,  $p<0.0002$ ) and a greater proportion of individuals with TMA (41.7% vs.  
182 7,32%,  $p<0.0001$ ). No difference was seen in the treatment prescribed to both patient groups.  
183 Patients progressing to CKD-KRT were followed for less time (7 vs. 69 months,  $p<0.0001$ ) on  
184 account of more pronounced eGFR decreases (-8.17 vs. -0.21 ml/min/1.73m<sup>2</sup>/ano,  $p<0.0001$ ).

185 Immunohistochemistry for CD68 (Figure 1) was performed to look into macrophage-  
186 mediated tissue inflammation in 76 patients, nine from the group of 21 patients with TMA  
187 (43%) and 67 without TMA (69.1%). Figure 1 shows immunohistochemistry images derived  
188 from renal biopsy specimens. No statistically significant difference was found when patients  
189 with and without TMA were compared for number of CD68 positive glomerular (4.3 vs. 2.25,  
190  $p=0.12$ ) or interstitial (25.4 vs. 18.3,  $p=0.25$ ) cells. The comparison between patients  
191 progressing or not to CKD-KRT did not yield significant differences for glomerular cells  
192 labeled positive for CD68 (3.35 vs. 2.24,  $p=0.38$ ), but significantly more CD68 interstitial cells  
193 were seen in individuals progressing to CKD-KRT (32.5 vs. 15.6,  $p<0.0001$ ) (Table 4).

194 Logistic regression performed to assess risk factors independently related to the primary  
195 end point found that female sex was protective against the condition (Hazard Ratio - HR 0.26;  
196 95% CI 0.09-0.72,  $p=0.01$ ), while T1/T2 scores (HR: 11.9; 95% CI 4.1-35.3,  $p<0.001$ ) and  
197 histologic signs of TMA (HR: 11.5; 95% CI 3.2; 41.7,  $p<0.001$ ) were associated with  
198 progression to CKD-KRT (Table 5). Figure 2 shows the differences in renal survival for patients  
199 with and without evidences of TMA in kidney biopsy.

200

201 **DISCUSSION**



202           Some clinical findings associated with worse outcomes in individuals with IgAN – male  
203 sex, older age, persistent microscopic hematuria, hypertension, proteinuria, and creatinine levels  
204 on kidney biopsy<sup>21-24</sup> – have been described as a factor in the progression to CKD-KRT within  
205 five years seen in approximately 30% of the individuals with the condition.<sup>4,22,25</sup> In light of this  
206 fact and the variety of histologic findings to consider, the need to standardize the analysis of  
207 kidney biopsy of IgAN patients and the search for histology-related prognostic factors led to the  
208 creation of histologic classifications,<sup>6-8,26</sup> with the Oxford Classification standing as the most  
209 widely accepted among pathologists and nephrologists. However, the OC does not consider  
210 TMA despite its role in disease progression and although it has been described to affect 2.2% to  
211 53% of the individuals with IgAN.<sup>11,26</sup> Discrepancies in the frequency of involvement by TMA  
212 may be ascribed to differences among populations, although the adoption of diverse criteria to  
213 diagnose the condition – some including electron microscopy examination and  
214 immunohistochemistry staining protocols – is a relevant matter to consider.

215           El Karoui *et al*<sup>11</sup> studied a multi-center population of patients with IgAN and TMA. The  
216 author found that 68 (53.15%) of 128 patients had histologic evidence of TMA, a proportion  
217 higher than the reported in other studies. Diagnosis of TMA was based on light microscopy and  
218 immunohistochemistry staining for CD61. Patients with TMA progressed more frequently to  
219 CKD-KRT. A multicenter study carried out in Spain<sup>27</sup> included patients with IgAN and  
220 malignant hypertension. In the study, 13/186 patients (7%) were diagnosed with malignant  
221 hypertension. Patients with the condition were predominantly men in the fourth decade of life.  
222 Ten patients were on KRT at the end of the follow-up period. Three of the six individuals  
223 submitted to kidney transplantation returned to dialysis due to chronic allograft nephropathy  
224 associated with recurrent IgAN, although they did not have signs of malignant hypertension. Cai  
225 *et al*<sup>10</sup> studied 944 patients with IgAN from a single center in China, in which 194 patients with  
226 histologic evidence of TMA were found based on light and electron microscopy examination.  
227 Patients with TMA were older than their counterparts. Most were males with worse renal  
228 function, more proteinuria, and, interestingly enough, no differences in serum TMA markers. As

229 seen in previous literature reports, patients with TMA reached the target endpoint more  
230 frequently and quickly. Haas *et al*<sup>26</sup> looked into 2290 patients with IgAN and found 49 (2.2%)  
231 with TMA based on light and electron microscopy examination. The patients in this group were  
232 younger and had worse renal function and proteinuria on admission. They were not analyzed for  
233 progression to CKD-KRT. Other studies support these findings.<sup>10,29-31</sup> Our study found  
234 histologic evidence of TMA in 17.8% of the included patients, confirming some of the clinical  
235 and workup findings described previously in the literature (more individuals with hypertension,  
236 worse renal function, and worse outcomes).<sup>9-11</sup> As reported in other studies,<sup>9,10</sup> patients often do  
237 not present with clinical or workup findings indicative of TMA. Therefore, in our study only  
238 anemia and increased schistocyte counts stood out in the comparison of individuals with and  
239 without histologic evidence of TMA, since the groups were not different in terms of platelet  
240 counts, serum LDH, or haptoglobin levels.

241 Cases of IgAN associated with complement factor mutation have been described,<sup>31-34</sup>  
242 some of which effectively treated with Eculizumab.<sup>32</sup> What is not known is whether patients  
243 with IgAN and TMA actually present with a combination of the two diseases or if  
244 immunoglobulin deposition associated with the onset of the disease might produce local  
245 manifestations of TMA. The early pathogenesis of TMA has been linked to endothelial  
246 lesion.<sup>35,36</sup> Studies have shown that in addition to tropism by immunoglobulin degradation and  
247 complement factors in the mesangium, patients with IgAN also produce anti-endothelial cell  
248 antibodies,<sup>37-38</sup> thereby causing endothelial lesion and dissociation of the endothelium and the  
249 glomerular basement membrane, activation of the immune system (cytokines, inflammatory  
250 cells, complement system) and the coagulation cascade, producing local glomerular  
251 thrombosis.<sup>35,39,40</sup> On the other hand, the complement system may be activated via the lectin  
252 pathway as hypoglycosylated IgA1 – linked to the pathogenesis of IgAN – binds to endothelial  
253 cells.<sup>41-43</sup> This finding may be demonstrated by the overwhelming positivity for C4d in patients  
254 with IgAN and TMA without co-deposition of C1q.<sup>10,35</sup> Both theories are plausible, since it is  
255 not rare to find patients with only histologic and no clinical signs of TMA. We did not observe

256 differences in the profile or intensity of immunoglobulin deposition (IgG, IgM) or complement  
257 proteins (C3, C1q) in our series between patients with and without TMA or individuals that  
258 progressed versus patients that did not progress to CKD-KRT. However, none of the patients  
259 with TMA had deposition of IgG or C1q, while 10.3% of the patients without TMA had  
260 deposition of IgG and 7.3% of C1q. Chua *et al*<sup>9</sup> employed markers not used in routine clinical  
261 practice to assess the complement system and analyze depositions of C4d, C5b-9, mannose-  
262 binding lectin and Factor B in the renal tissue of patients with IgAN with and without TMA.  
263 The authors found an association between C4d and TMA and the presence of the two conditions  
264 with worse renal survival, thus stressing the role of the complement system in the pathogenesis  
265 of TMA in patients with IgAN.

266 By approaching the complement system from a systemic standpoint, we found, in our  
267 series, more patients with low C3 levels in the TMA group when compared with individuals  
268 without TMA and with the group of patients that progressed to CKD requiring KRT. This  
269 finding is not reflected in renal tissue, in which C3 deposition did not occur differently in  
270 patients with or without TMA (85.7 *vs.* 77.3,  $p=0.57$ ) or in individuals progressing or not to  
271 CKD-KRT (80.5 *vs.* 78.0,  $p=0.95$ ). In regard to MEST-C and TMA parameters, we found  
272 associations only with parameter E, which identifies active glomerular endothelial lesions in  
273 association with findings consistent with TMA. Since parameter E is modifiable via treatment, it  
274 is important to notice that no significant difference was seen in the treatment prescribed to the  
275 two groups of patients.

276 Recent studies<sup>2,43</sup> pointed to the relevance of glomerular tissue expression of CD68 as  
277 an additional marker that allows pathologists to more accurately define parameter E for  
278 endocapillary hypercellularity, as described by Soares *et al.*<sup>43</sup> In our series, this marker did not  
279 elicit differences in the number of cells labeled for CD68 in the glomeruli or tubulointerstitium  
280 of patients with and without TMA. However, expression was increased in the tubulointerstitium  
281 of patients progressing to CKD requiring KRT on account of the histologic evidence of chronic  
282 disease described previously by Soares *et al*<sup>43</sup>.

283           The limitations of this study derive from the fact that it was carried out in a single  
284 center and that diagnostic examination for TMA was based only on light microscopy, without  
285 the aid of immunohistochemistry staining or electron microscopy. However, studies performed  
286 in a single center are known for more consistent compliance with procedure, follow-up, and  
287 treatment processes.

288           In conclusion, our study found that patients with IgAN and histologic evidences of  
289 TMA had clinically worse kidney function, more hypertension and hematuria, greater  
290 proportions of low serum C3 at kidney biopsy, with a larger amount of individuals with  
291 endocapillary hypercellularity (E1). Histologic evidence of TMA were not concurrent with  
292 clinical/laboratory markers of the condition. Patients with histologic evidence of TMA  
293 progressed more frequently and quickly to CKD-KRT when compared to individuals without  
294 TMA. Having signs of TMA in kidney biopsy specimens was an independent marker for  
295 progression to CKD-KRT when compared to other histologic predictors in the Oxford  
296 Classification. Additional studies are required to investigate the role of the complement system  
297 in TMA and IgAN and support the development of new therapeutic targets.

298

## 299 **DISCLOSURE**

300 The authors declare no competing interests

301

## 302 **REFERENCES**

- 303 1. Rodrigues JC, Mark Haas M and Reich HN. IgA Nephropathy. *Clin J Am Soc Nephrol.*  
304 2017;12(4):677–686.
- 305 2. Trimarchi H, Barratt J, Monteiro RC, Feehally J. IgA nephropathy: "State of the art": a  
306 report from the 15th International Symposium on IgA Nephropathy celebrating the 50th  
307 anniversary of its first description. *Kidney Int.* 2019;95(4):750-756.
- 308 3. D'Amico G. Natural history of idiopathic IgA nephropathy and factors predictive of disease  
309 outcome. *Semin Nephrol.* 2004;24(3):179-196.

- 310 4. Wyatt RJ, Julian BA. IgA nephropathy. *N Engl J Med*. 2013;20;368(25):2402-2414.
- 311 5. Soares MF and Roberts IS. IgA nephropathy: an update. *Curr Opin Nephrol Hypertens*.  
312 2017;26(3):165–171.
- 313 6. Working Group of the International IgA Nephropathy Network and the Renal Pathology  
314 Society, Cattran DC, Coppo R, Cook HT, Feehally J, Roberts IS, Troyanov S, Alpers CE,  
315 Amore A, Barratt J, Berthoux F, Bonsib S, Bruijn JA, D'Agati V, D'Amico G, Emancipator  
316 S, Emma F, Ferrario F, Fervenza FC, Florquin S, Fogo A, Geddes CC, Groene HJ, Haas M,  
317 Herzenberg AM, Hill PA, Hogg RJ, Hsu SI, Jennette JC, Joh K, Julian BA, Kawamura T,  
318 Lai FM, Leung CB, Li LS, Li PK, Liu ZH, Mackinnon B, Mezzano S, Schena FP, Tomino  
319 Y, Walker PD, Wang H, Weening JJ, Yoshikawa N, Zhang H. The Oxford classification of  
320 IgA nephropathy: rationale, clinicopathological correlations, and classification. *Kidney Int*.  
321 2009;76(5):534-545.
- 322 7. Working Group of the International IgA Nephropathy Network and the Renal Pathology  
323 Society, Roberts IS, Cook HT, Troyanov S, Alpers CE, Amore A, Barratt J, Berthoux F,  
324 Bonsib S, Bruijn JA, Cattran DC, Coppo R, D'Agati V, D'Amico G, Emancipator S, Emma  
325 F, Feehally J, Ferrario F, Fervenza FC, Florquin S, Fogo A, Geddes CC, Groene HJ, Haas  
326 M, Herzenberg AM, Hill PA, Hogg RJ, Hsu SI, Jennette JC, Joh K, Julian BA, Kawamura  
327 T, Lai FM, Li LS, Li PK, Liu ZH, Mackinnon B, Mezzano S, Schena FP, Tomino Y,  
328 Walker PD, Wang H, Weening JJ, Yoshikawa N, Zhang H. The Oxford classification of  
329 IgA nephropathy: pathology definitions, correlations, and reproducibility. *Kidney Int*.  
330 2009;76(5):546-556.
- 331 8. Trimarchi H, Barratt J, Cattran DC, Cook HT, Coppo R, Haas M, Liu ZH, Roberts IS,  
332 Yuzawa Y, Zhang H, Feehally J, IgAN Classification Working Group of the International  
333 IgA Nephropathy Network and the Renal Pathology Society; Conference Participants.  
334 Oxford Classification of IgA nephropathy 2016: an update from the IgA Nephropathy  
335 Classification Working Group. *Kidney Int*. 2017;91(5):1014-1021.

- 336 9. Chua JS, Zandbergen M, Wolterbeek R, Baelde HJ, van Es LA, de Fijter JW, Bruijn JA,  
337 Bajema IM. Complement-mediated microangiopathy in IgA nephropathy and IgA vasculitis  
338 with nephritis. *Mod Pathol*. 2019;32(8):1147-1157.
- 339 10. Cai Q, Shi S, Wang S, Ren Y, Hou W, Liu L, Lv J, Haas M, Zhang H. Microangiopathic  
340 Lesions in IgA Nephropathy: A Cohort Study. *Am J Kidney Dis*. 2019;74(5):629-639.
- 341 11. El Karoui K, Hill GS, Karras A, Jacquot C, Moulonguet L, Kourilsky O, Frémeaux-Bacchi  
342 V, Delahousse M, Duong Van Huyen JP, Loupy A, Bruneval P, Nochy D.. A  
343 clinicopathologic study of thrombotic microangiopathy in IgA nephropathy. *J Am Soc*  
344 *Nephrol*. 2012;23(1):137-148.
- 345 12. Brocklebank V, Wood KM and Kavanagh D. Thrombotic Microangiopathy and the Kidney.  
346 *Clin J Am Soc Nephrol*. 2018;13(2):300–317.
- 347 13. Radhakrishnan J, Perazella MA. Drug-induced glomerular disease: attention required! *Clin*  
348 *J Am Soc Nephrol*. 2015;10(7):1287-1290.
- 349 14. Li C, Yap DYH, Chan G, Wen YB, Li H, Tang C, Li XM, Li XW, Chan TM. Clinical  
350 Outcomes and Clinico-pathological Correlations in Lupus Nephritis with Kidney Biopsy  
351 Showing Thrombotic Microangiopathy. *J Rheumatol*. 2019;46(11):1478-1484.
- 352 15. Buob D, Decambon M, Gnemmi V, Frimat M, Hoffmann M, Azar R, Gheerbrant JD,  
353 Guincestre T, Noël C, Copin MC, Glowacki F. Collapsing glomerulopathy is common in  
354 the setting of thrombotic microangiopathy of the native kidney. *Kidney Int*.  
355 2016;90(6):1321-1331.
- 356 16. Levey AS, Stevens LA, Schmid CH, Zhang YL, Castro AF 3rd, Feldman HI, Kusek JW,  
357 Eggers P, Van Lente F, Greene T, Coresh J; CKD-EPI (Chronic Kidney Disease  
358 Epidemiology Collaboration). A new equation to estimate glomerular filtration rate. *Ann*  
359 *Intern Med*. 2009;150(9):604-612.
- 360 17. Williams B, Mancia G, Spiering W, Agabiti Rosei E, Azizi M, Burnier M, Clement DL,  
361 Coca A, de Simone G, Dominiczak A, Kahan T, Mahfoud F, Redon J, Ruilope L, Zanchetti  
362 A, Kerins M, Kjeldsen SE, Kreutz R, Laurent S, Lip GYH, McManus R, Narkiewicz K,  
363 Ruschitzka F, Schmieder RE, Shlyakhto E, Tsioufis C, Aboyans V, Desormais I; ESC

- 364 Scientific Document Group. 2018 ESC/ESH Guidelines for the management of arterial  
365 hypertension. *Eur Heart J*. 2018;39(33):3021-3104.
- 366 18. World Health Organization. Nutritional anaemias: Report of a WHO scientific group.  
367 Geneva, Switzerland: *World Health Organization*; 1968.
- 368 19. Williamson DR, Albert M, Heels-Ansdell D, Arnold DM, Lauzier F, Zarychanski R,  
369 Crowther M, Warkentin TE, Dodek P, Cade J, Lesur O, Lim W, Fowler R, Lamontagne F,  
370 Langevin S, Freitag A, Muscedere J, Friedrich JO, Geerts W, Burry L, Alhashemi J, Cook  
371 D; PROTECT collaborators, the Canadian Critical Care Trials Group, and the Australian  
372 and New Zealand Intensive Care Society Clinical Trials Group. Thrombocytopenia in  
373 critically ill patients receiving thromboprophylaxis: frequency, risk factors, and outcomes.  
374 *Chest*. 2013;144(4):1207-1215.
- 375 20. Goodship TH, Cook HT, Fakhouri F, Fervenza FC, Frémeaux-Bacchi V, Kavanagh D,  
376 Nester CM, Noris M, Pickering MC, Rodríguez de Córdoba S, Roumenina LT, Sethi S,  
377 Smith RJ; Conference Participants. Atypical hemolytic uremic syndrome and C3  
378 glomerulopathy: conclusions from a “Kidney Disease: Improving Global Outcomes”  
379 (KDIGO) Controversies Conference. *Kidney Int*. 2017;91(3):539-551.
- 380 21. Maixnerova D, Reily C, Bian Q, Neprasova M, Novak J, Tesar V. Markers for the  
381 progression of IgA nephropathy. *J Nephrol*. 2016;29(4):535-541.
- 382 22. Lai KN, Tang SCW, Schena FP, Novak J, Tomino Y, Fogo AB, Glassock RJ. IgA  
383 Nephropathy. *Nat Rev Dis Primers*. 2016;2:16001.
- 384 23. Xie J, Kiryluk K, Wang W, Wang Z, Guo S, Shen P, Ren H, Pan X, Chen X, Zhang W, Li  
385 X, Shi H, Li Y, Gharavi AG, Chen N.. Predicting Progression of IgA Nephropathy: New  
386 Clinical Progression Risk Score. *PLoS One*. 2012;7(6):e38904.
- 387 24. Moriyama T. Clinical and histological features and therapeutic strategies for IgA  
388 nephropathy. *Clin Exp Nephrol*. 2019;23(9):1089-1099.
- 389 25. Barbour S and Reich H. An update on predicting renal progression in IgA nephropathy.  
390 *Curr Opin Nephrol Hypertens*. 2018;27(3):214-220.

- 391 26. Haas M. Histologic subclassification of IgA nephropathy: a clinicopathologic study of 244  
392 cases. *Am J Kidney Dis*. 1997;29(6):829-842.
- 393 27. Sevillano ÁM, Cabrera J, Gutiérrez E, Morales E, Mérida E, Huerta A, Cavero T,  
394 Hernández E, Moreno JA, Praga M. Malignant hypertension: a type of IgA nephropathy  
395 manifestation with poor prognosis. *Nefrologia*. 2015;35(1):42-49.
- 396 28. Haas M, Mirocha J. Thrombotic microangiopathy in IgA nephropathy. *Kidney Dis*.  
397 2018;4:165–166
- 398 29. Nasri H. Thrombotic microangiopathy in IgA nephropathy. *Iran Red Crescent Med J*.  
399 2013;15(12):e10234.
- 400 30. Chang A, Kowalewska J, Smith KD, Nicosia RF, Alpers CE. A clinicopathologic study of  
401 thrombotic microangiopathy in the setting of IgA nephropathy. *Clin Nephrol*.  
402 2006;66(6):397–404.
- 403 31. Schmitt R, Krmar RT, Kristoffersson A, Söderberg M, Karpman D. IgA nephropathy  
404 associated with a novel N-terminal mutation in factor H. *Eur J Pediatr*. 2011;170(1):107-  
405 110.
- 406 32. Nakamura H, Anayama M, Makino M, Makino Y, Tamura K, Nagasawa M. Atypical  
407 Hemolytic Uremic Syndrome Associated with Complement Factor H Mutation and IgA  
408 Nephropathy: A Case Report Successfully Treated with Eculizumab. *Nephron*.  
409 2018;138(4):324-327.
- 410 33. Morita S, Sakai T, Okamoto N, Funabiki A, Okada Y, Hasegawa Y, Amano K, Yoshikawa  
411 N, Kasuga M. Hemolytic uremic syndrome associated with immunoglobulin A  
412 nephropathy. A case report and review of cases of hemolytic uremic syndrome with  
413 glomerular disease. *Intern Med*. 1999;38(6):495–499.
- 414 34. Manenti L, Gnappi E, Vaglio A, Allegri L, Noris M, Bresin E, Pilato FP, Valoti E, Pasquali  
415 S, Buzio C. Atypical haemolytic uraemic syndrome with underlying glomerulopathies. A  
416 case series and a review of the literature. *Nephrol Dial Transplant*, 2013;28(9):2246–2259.



- 417 35. Trimarchi H and Coppo R. Glomerular endothelial activation, C4d deposits and  
418 microangiopathy in immunoglobulin A nephropathy. *Nephrol Dial Transplant*. 2019 Nov  
419 22. [Epub ahead of print].
- 420 36. Fujita E, Nagahama K, Shimizu A, Aoki M, Higo S, Yasuda F, Mii A, Fukui M, Kaneko T,  
421 Tsuruoka S.. Glomerular capillary and endothelial cell injury is associated with the  
422 formation of necrotizing and crescentic glomerular lesions in glomerulonephritis. *J*  
423 *NipponMed Sch*. 2015; 82(1):27–35.
- 424 37. Wang MX, Walker RG, Kincaid-Smith P. Clinicopathologic associations of anti-endothelial  
425 cell antibodies in immunoglobulin A nephropathy and lupus nephritis. *Am J Kidney Dis*.  
426 1993;22(3):378–386.
- 427 38. Coppo R, Amore A, Gianoglio B, Reyna A, Peruzzi L, Roccatello D, Alessi D, Sena LM.  
428 Serum IgA and macromolecular IgA reacting with mesangial matrix components. *Contrib*  
429 *Nephrol*. 1993;104:162–171.
- 430 39. Markiewski MM, Nilsson B, Ekdahl KN, Mollnes TE, Lambris JD. Complement and  
431 coagulation: strangers or partners in crime? *Trends Immunol*. 2007;28(4):184–192.
- 432 40. Bettoni S, Galbusera M, Gastoldi S, Donadelli R, Tentori C, Spartà G, Bresin E, Mele C,  
433 Alberti M, Tortajada A, Yebenes H, Remuzzi G, Noris M. Interaction between Multimeric  
434 von Willebrand Factor and Complement: A Fresh Look to the Pathophysiology of  
435 Microvascular Thrombosis. *J Immunol*. 2017;199(3):1021-1040.
- 436 41. Espinosa M, Ortega R, Gómez-Carrasco JM, López-Rubio F, López-Andreu M, López-  
437 Oliva MO, et al. Mesangial C4d deposition: a new prognostic factor in IgA nephropathy.  
438 *Nephrol Dial Transplant*. 2009;24(3):886-891.
- 439 42. Endo M, Ohi H, Ohsawa I, Fujita T, Matsushita M, Fujita T. Glomerular deposition  
440 ofmannose-binding lectin (MBL) indicates a novel mechanism of complement activation in  
441 IgA Nephropathy. *Nephrol Dial Transplant*. 1998;13(8):1984–1990.
- 442 43. Segarra A, Romero K, Agraz I, Ramos N, Madrid A, Carnicer C, Jatem E, Vilalta R, Lara  
443 LE, Ostos E, Valtierra N, Jaramillo J, Arredondo KV, Ariceta G, Martinez C. Mesangial  
444 C4d Deposits in Early IgA Nephropathy. *Clin J Am Soc Nephrol*. 2018;13(2):258-264.

445 44. Soares MF, Genitscha V, Chakerac A, Smitha A, MacEwend C, Bellura SS and Roberts  
446 ISD. Relationship between renal CD68+ infiltrates and the Oxford Classification of IgA  
447 Nephropathy. *Histopathology*. 2019;74(4):629-637.

448

449

450

451

452

453

454

455

456

457

458

459

460

461

462

463

464

465

466

467

468

469

470 **TABLES**

471 **Table 1.** Baseline clinical characteristics and kidney biopsy findings of patients with IgA  
472 Nephropathy.

|                                                            | <b>N=118</b>         |
|------------------------------------------------------------|----------------------|
| Age (years)                                                | 33 (25;43)           |
| Female sex (n/%)                                           | 65 / 55              |
| Serum creatinine (mg/dL)                                   | 1.45 (0.99;2.6)      |
| e-GFR by CKD-EPI (ml/min/1.73m <sup>2</sup> ) <sup>b</sup> | 48.8 (27.5;78.5)     |
| 24h-proteinuria (g)                                        | 2.01 (1.1;3.7)       |
| Serum albumin (g/dl)                                       | 3.4 (2.9;3.8)        |
| Hematuria (n/%)                                            | 106 / 89.8           |
| Hypertension (n/%)                                         | 80 / 67.8            |
| Low serum C3 levels (n/%)                                  | 15 / 12.5            |
| Follow-up (months)                                         | 65 (27;115)          |
| ΔeGFR (ml/min/1.73m <sup>2</sup> /year)                    | -1.25 (-7.11 ; 0.91) |
| CKD-KRT (n/%)                                              | 36 / 30.5            |
| Time to CKD-KRT (months)                                   | 9 (3;38)             |
| Kidney Histology - Oxford Classification (n/%)             |                      |
| M1                                                         | 90 / 76.3            |
| E1                                                         | 42 / 35.6            |
| S1                                                         | 83 / 70.3            |
| T1/T2                                                      | 45 / 38.3            |
| C1/C2                                                      | 34 / 28.8            |
| Thrombotic Microangiopathy (n/%)                           | 21 / 17.8            |

473 *eGFR*: estimated glomerular filtration rate, *CKD requiring RRT*: Chronic Kidney  
474 Disease requiring Renal Replacement Therapy, *M1*: mesangial hypercellularity, *E1*:  
475 endocapillary hypercellularity, *S1*: segmental glomerulosclerosis, *T1/T2*: tubular  
476 atrophy or interstitial fibrosis, *C1/C2*: cellular crescent  
477

478 **Table 2.** Laboratory findings of thrombotic microangiopathy in patients with and without  
479 histologic evidence of TMA.

|                                              | <b>TMA<br/>(n=21)</b> | <b>No-TMA<br/>(n=97)</b> | <b><i>P</i></b> |
|----------------------------------------------|-----------------------|--------------------------|-----------------|
| Anemia* (n/%)                                | 13 / 61.9             | 24 / 24.7                | 0.002           |
| Low Platelet count (n/%)                     | 3 / 14.3              | 4 / 4.1                  | 0.07            |
| High serum LDH level (n/%)                   | 13 / 61.9             | 45 / 46.4                | 0.29            |
| Low serum haptoglobin level (n/%)            | 2 / 9.5               | 2 / 2.6                  | 0.29            |
| High serum indirect bilirubin level (n/%)    | 0 / 0                 | 4 / 4.12                 | 0.77            |
| Schistocytes on peripheral blood smear (n/%) | 4 / 19                | 3 / 3.1                  | 0.02            |

480 *LDH*: Lactate Dehydrogenase.  
481 \* Defined as hemoglobin <12g/l for females and <13g/l for males<sup>20</sup>  
482

483 **Table 3.** Analysis of clinical parameters and laboratory findings in IgAN patients with and  
 484 without histologic evidence of TMA.

|                                                            | <b>TMA<br/>(n=21)</b> | <b>No-TMA<br/>(n=97)</b> | <b>p</b> |
|------------------------------------------------------------|-----------------------|--------------------------|----------|
| Male (n/%)                                                 | 10 / 47.6             | 43 / 44.3                | 0.62     |
| Age (years)                                                | 32 (27;41)            | 33 (24;44)               | 0.83     |
| Hypertension (n/%)                                         | 21 / 100              | 59 / 61                  | <0.0001  |
| Hematuria (n/%)                                            | 21 / 100              | 85 / 87.6                | 0.0001   |
| Serum creatinine (mg/dL)                                   | 3.8 (2.2;5.8)         | 1.38 (0.91;1.9)          | 0.0001   |
| e-GFR by CKD-EPI (ml/min/1,73m <sup>2</sup> ) <sup>a</sup> | 18.3 (9.2;30.5)       | 60.2 (35.1;87.5)         | 0.0001   |
| 24h-proteinuria (g)                                        | 1.9 (0.9;3.96)        | 2 (1.3;3.6)              | 0.86     |
| Serum albumin (g/dL)                                       | 3.2 (2.55;3.9)        | 3.5 (3.1;3.8)            | 0.26     |
| Low serum C3 levels (n/%)                                  | 6 / 28.5              | 9 / 10.4                 | 0.003    |
| Treatment                                                  |                       |                          |          |
| ACE inhibitor or ARB alone (n/%)                           | 19 / 89.4             | 78 / 80.4                | 0.37     |
| Corticosteroids (n/%)                                      | 11 / 52.6             | 63 / 64.7                | 0.35     |
| Other immunosuppressants (n/%)                             | 8 / 36.8              | 34 / 35.2                | 0.9      |
| Kidney Histology – Oxford Classification (n/%)             |                       |                          |          |
| M1                                                         | 19 / 89.7             | 75 / 77.3                | 0.23     |
| E1                                                         | 14 / 68               | 31 / 32                  | 0.002    |
| S1                                                         | 16 / 78.9             | 70 / 72.1                | 0.54     |
| T1/T2                                                      | 12 / 57.9             | 35 / 36.1                | 0.07     |
| C1/C2                                                      | 8 / 32.1              | 26 / 26.8                | 0.57     |
| Immunofluorescence positivity (n/%)                        |                       |                          |          |
| IgM                                                        | 6 / 28.5              | 23 / 23.7                | 0.84     |
| IgG                                                        | 0 / 0                 | 10 / 10.3                | 0.26     |
| C3                                                         | 18 / 85.7             | 75 / 77.3                | 0.57     |
| C1q                                                        | 0 / 0                 | 7 / 7.2                  | 0.44     |
| CD68 Immunohistochemistry (cells/field)                    |                       |                          |          |
| Glomeruli                                                  | 4.3 (3.02;6.0)        | 2.25 (1.56;5)            | 0.12     |
| Tubulointerstitium                                         | 25.4 (14;34.7)        | 18.3 (9.8;28.3)          | 0.25     |
| Follow-up (months)                                         | 7 (3;21)              | 65 (27;115)              | <0.0001  |
| ΔeGFR (ml/min/1,73m <sup>2</sup> /year)                    | -6.8 (-24;0)          | -0.65 (-4.48;2.3)        | 0.01     |
| CKD-KRT (n/%)                                              | 15 / 71.4             | 21 / 21.6                | <0.0001  |
| Time to CKD-KRT (months)                                   | 3 (3;7)               | 16 (4;64)                | 0.003    |

485 *e-GFR* estimated glomerular filtration rate, *M1*: mesangial hypercellularity, *E1*: endocapillary hypercellularity, *S1*: segmental  
 486 glomerulosclerosis, *T1/T2*: tubular atrophy or interstitial fibrosis, *C1/C2*: cellular crescent, *CKD requiring RRT*: Chronic  
 487 Kidney Disease requiring Renal Replacement Therapy  
 488 <sup>a</sup>As determined by the Chronic Kidney Disease–Epidemiology Collaboration equation  
 489

490

491

492

493

**494 Table 4.** Clinical parameters and laboratory findings of IgAN patients progressing or not to CKD-KRT

|                                                | CKD-KRT<br>(n=36) | No CKD-KRT<br>(n=82) | <i>p</i> |
|------------------------------------------------|-------------------|----------------------|----------|
| Age (years)                                    | 30 (24;40)        | 34 (26;50)           | 0.04     |
| Male sex (n/%)                                 | 23 (63,8)         | 30 (36,5)            | 0.01     |
| Creatinine (mg/dL)                             | 3 (2.3;5.6)       | 1.2 (0.9;1.7)        | <0.0001  |
| eGFR (ml/min/1.73m <sup>2</sup> )              | 22.5 (9.6;36)     | 64.8 (40;91.7)       | <0.0001  |
| Proteinuria (g/day)                            | 2.4 (1.3;4.1)     | 1.58 (1;2.98)        | 0.07     |
| Albumin (g/dL)                                 | 3.4 (2.7;3.8)     | 3.5 (3;3.9)          | 0.61     |
| Hematuria (n/%)                                | 32 / 88.9         | 70 / 85.3            | 0.77     |
| Hypertension (n/%)                             | 31 / 86.1         | 46 / 56.1            | 0.0016   |
| Consumption of C3 (n/%)                        | 9 / 25.7          | 6 / 7.3              | 0.01     |
| Follow-up (months)                             | 7 (3;39)          | 69 (35;122)          | <0.0001  |
| ΔGFR (ml/min/1.73m <sup>2</sup> /year)         | -8.17 (-31;2.46)  | -0.21 (-2.1;2.7)     | <0.0001  |
| Kidney Histology – Oxford Classification (n/%) |                   |                      |          |
| M1                                             | 21 / 58.33        | 60 / 73.1            | 0.13     |
| E1                                             | 16 / 44.4         | 24 / 29.2            | 0.13     |
| S1                                             | 24 / 66.6         | 51 / 62.2            | 0.68     |
| T1/T2                                          | 20 / 54.2         | 19 / 23.2            | 0.002    |
| C1/C2                                          | 13 / 36.1         | 18 / 21.9            | 0.11     |
| Immunofluorescence positivity (n/%)            |                   |                      |          |
| IgM                                            | 11 / 30.5         | 18 / 21.9            | 0.44     |
| IgG                                            | 3 / 8.3           | 7 / 8.53             | 0.74     |
| C3                                             | 29 / 80.5         | 64 / 78              | 0.95     |
| C1q                                            | 2 / 5.5           | 5 / 6.1              | 0.75     |
| CD68 Immunohistochemistry (cells/field)        |                   |                      |          |
| Glomeruli                                      | 3.35 (1.87;5.82)  | 2.24 (1.47;5.04)     | 0.38     |
| Tubulointerstitium                             | 32.5 (24.6;51.9)  | 15.6 (8.99;24.4)     | <0.0001  |
| TMA (n/%)                                      | 15 / 41.7         | 6 / 7.32             | <0.0001  |
| Treatment                                      |                   |                      |          |
| ACE inhibitor or ARB (n/%)                     | 17 / 47.2         | 54 / 65.8            | 0.06     |
| Corticosteroids (n/%)                          | 13 / 36.1         | 40 / 48.8            | 0.23     |
| Other immunosuppressants (n/%)                 | 8 / 22.2          | 16 / 19.6            | 0.81     |

495 *eGFR* estimated glomerular filtration rate. *SD* standard deviation. *M1*: mesangial hypercellularity. *E1*: endocapillary  
496 hypercellularity. *S1*: segmental glomerulosclerosis. *T1/T2*: tubular atrophy or interstitial fibrosis. *C1/C2* cellular  
497 crescent. *ACEi* angiotensin-converting enzyme inhibitor. *ARB* angiotensin II receptor blocker *CKD-RRT*: Chronic  
498 Kidney Disease requiring Kidney Replacement Therapy  
499 <sup>a</sup>As determined by the Chronic Kidney Disease–Epidemiology Collaboration equation  
500

501 [ **Table 5.** Logistic regression analysis for the primary outcome<sup>a</sup> adjusted for sex, hypertension,  
502 creatinine, eGFR, TMA, and the Oxford classification.  
503

| Variable | HR   | 95% Confidence Interval for HR |       | <i>p</i> |
|----------|------|--------------------------------|-------|----------|
|          |      | Lower                          | Upper |          |
| Female   | 0.26 | 0.09                           | 0.72  | 0.01     |
| T1/T2    | 11.9 | 4.1                            | 35.3  | <0.0001  |
| TMA      | 11.5 | 3.2                            | 41.7  | <0.0001  |

504 *HR* hazard ratio. *CI* confidence interval. *T1/T2* mild to severe tubular atrophy or  
505 interstitial fibrosis. *TMA*: Thrombotic Microangiopathy  
506 <sup>a</sup>CKD requiring RRT: Chronic Kidney Disease requiring Renal Replacement  
507 Therapy

508 **FIGURE LEGENDS**

509 **Figure 1.** CD68 immunohistochemistry of kidney biopsies of IgAN patients labeled positive in  
510 the A) glomerulus (x400) and B) tubulointerstitium (x200).

511 **Figure 2.** Survival free of dialysis of patients with IgAN with and without evidence of TMA in  
512 kidney biopsy specimens.

513

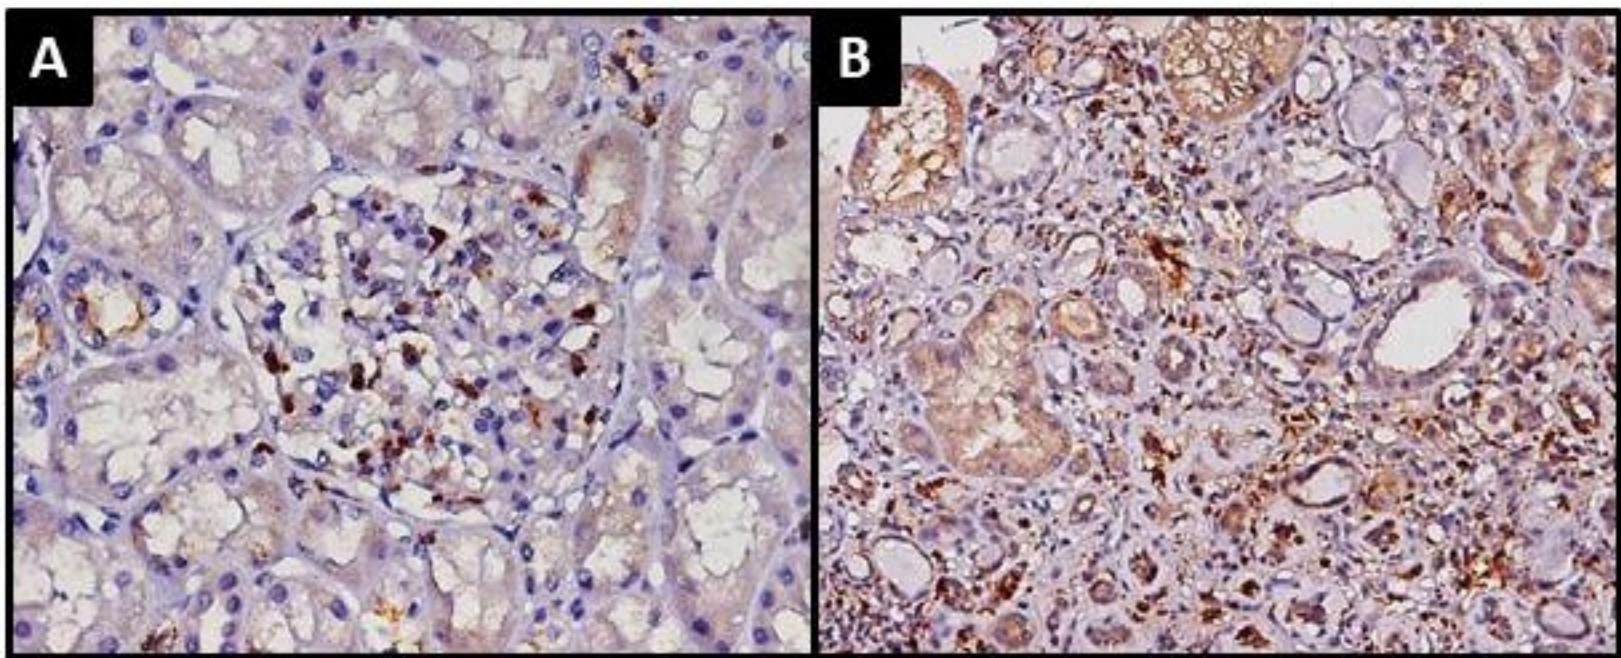

Figure 1

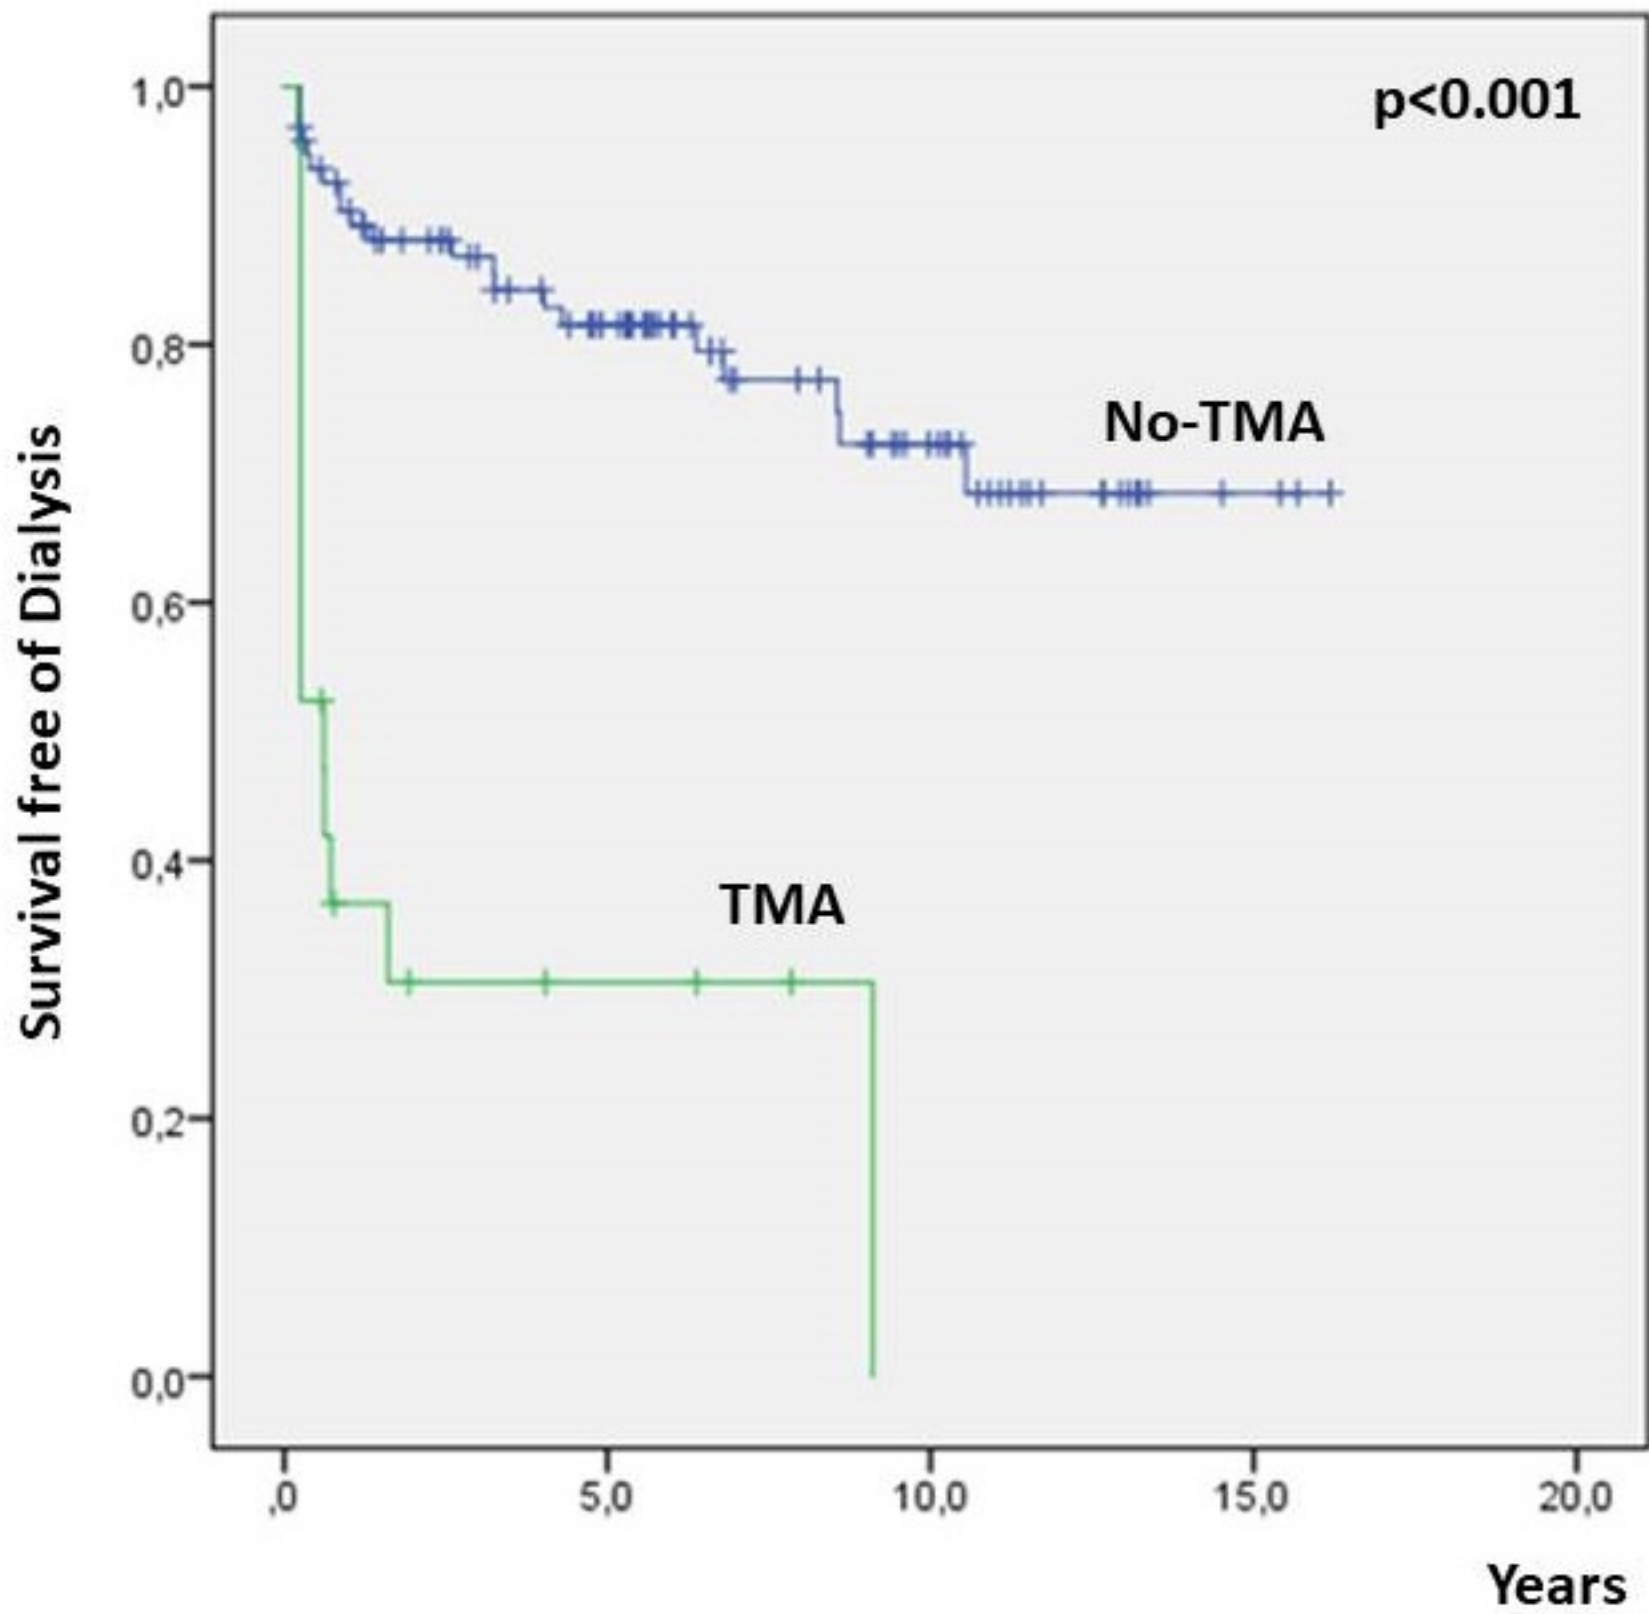

Figure
